# Supplementary material
Source: Springer Nature journal article supplement (https://www.springermedizin.de/resource/supplementary/12974_2009_206_MOESM3_ESM.pdf/9600994)

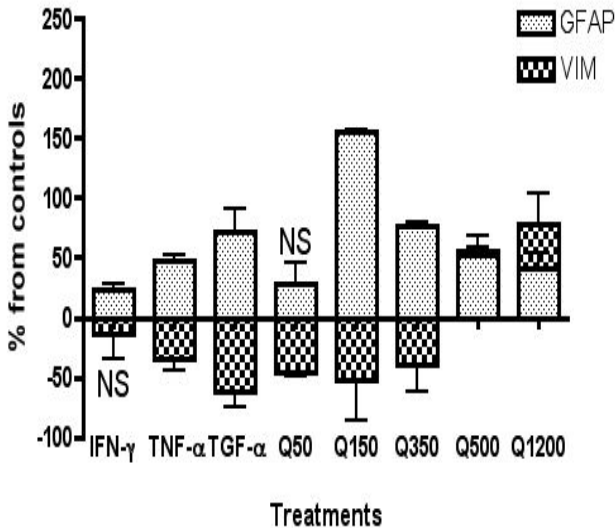

Supplement: MOESM3 [file 9600994]
